1 **A *Lotus japonicus* E3 ligase interacts with the Nod factor receptor 5 and positively**  
2 **regulates nodulation**

3

4 **Running title:** PUB13 positively regulates nodulation

5

6

7 Daniela Tsikou<sup>1,2</sup>, Estrella E. Ramirez<sup>2</sup>, Ioanna S. Psarrakou<sup>1</sup>, Jaslyn E. Wong<sup>2</sup>, Dorte B.  
8 Jensen<sup>2</sup>, Erika Isono<sup>3</sup>, Simona Radutoiu<sup>2\*</sup>, Kalliope K. Papadopoulou<sup>1\*</sup>

9

10 <sup>1</sup> Department of Biochemistry and Biotechnology, University of Thessaly, Biopolis, Larisa  
11 41500, Greece

12 <sup>2</sup> Department of Molecular Biology and Genetics, Aarhus University, Gustav Wieds Vej,  
13 Aarhus 8000 C, Denmark

14 <sup>3</sup> Department of Plant Systems Biology, Technical University of Munich, Emil-Ramann-Strabe  
15 4, Freising, Germany

16

17 **\*Authors for correspondence**

18 Kalliope K. Papadopoulou

19 University of Thessaly

20 Dept of Biochemistry and Biotechnology

21 Biopolis, 41500, Larissa, Greece

22 kalpapad@bio.uth.gr

23

24 Simona Radutoiu

25 Aarhus University

26 Dept of Molecular Biology and Genetics

27 Gustav Wieds Vej 10

28 8000 Aarhus C, Denmark

29 radutoiu@mbg.au.dk

30

31 **SUMMARY**

32 Post-translational modification of receptor proteins is involved in activation and de-activation  
33 of signaling systems in plants. Both ubiquitination and deubiquitination have been implicated  
34 in plant interactions with pathogens and symbionts. Here we present *LjPUB13*, a PUB-  
35 ARMADILLO repeat E3 ligase that specifically ubiquitinates the kinase domain of the Nod  
36 Factor receptor NFR5 and has a direct role in nodule organogenesis events in *Lotus japonicus*.  
37 Phenotypic analyses of three LORE1 retroelement insertion plant lines revealed that *pub13*  
38 plants display delayed and reduced nodulation capacity and retarded growth. *LjPUB13*  
39 expression is spatially regulated during symbiosis with *Mesorhizobium loti*, with increased  
40 levels in young developing nodules. Thus, *LjPUB13* is an E3 ligase with a positive regulatory  
41 role during the initial stages of nodulation in *L. japonicus*.

42

43 **Keywords**

44 E3 ligase, nodulation, *Lotus japonicus*, PUB13, ubiquitination, symbiosis

45

## 46 INTRODUCTION

47

48 The legume-rhizobia symbiosis leads to the formation of novel organs on the plant root,  
49 termed nodules. Rhizobia within nodule cells differentiate into bacteroids that fix atmospheric  
50 dinitrogen in exchange for plant carbohydrates. The symbiotic signalling process is initiated  
51 when rhizobia secrete nodulation (Nod) factors upon sensing flavonoids produced by  
52 compatible legumes. *Lotus japonicus* Nod factor receptors NFR1 and NFR5 and the  
53 corresponding proteins LYK3 and NFP in *Medicago truncatula* (Limpens et al., 2003; Madsen  
54 et al., 2003; Radutoiu et al., 2003; Arrighi et al., 2006; Mulder et al., 2006; Smit et al., 2007)  
55 are crucial for perception of rhizobial Nod factors. Rhizobia enter into roots through infection  
56 threads (ITs) that, in most cases, initiate in epidermal root hair cells and progress to inner root  
57 tissues (reviewed in Oldroyd et al., 2011). Formation of functional nodules requires two  
58 separate but tightly coordinated developmental processes: bacterial infection and nodule  
59 organogenesis. Protein ubiquitination has been identified as being critical for these two  
60 signalling pathways.

61 Ubiquitination of proteins, by which proteins are tagged by ubiquitin and subsequently  
62 destined to be degraded by the proteasome, is a regulatory process essential for eukaryotic  
63 growth, development and response to interacting microbes (Vierstra, 2009). In some cases,  
64 ubiquitination is important for regulating the activity or trafficking of the target protein  
65 (Komander, 2009). Post-translational modification by ubiquitination is accomplished by a  
66 three-step process that involves ATP-dependent activation of ubiquitin by an E1 enzyme,  
67 followed by conjugation by an E2 enzyme and specific ubiquitin ligation to substrate proteins  
68 by direct interaction by an E3 ligase (Hershko and Ciechanover, 1998; Pickart and Eddins,  
69 2004).

70 E3 ligases are divided into families based on their mechanism of action and on the  
71 presence of specific E2 interacting domains, such as HECT, RING and U-box (reviewed in  
72 Smalle and Vierstra, 2004; Stone and Callis, 2007). The largest class of plant U-box (PUB)  
73 proteins is the ARMADILLO (ARM) domain-containing PUB proteins that contain tandemly-  
74 repeated ARM motifs located at the C-terminal (Mudgil et al., 2004; Samuel et al., 2006). ARM  
75 repeat proteins are known to be involved in a number of different cellular processes including  
76 signal transduction, cytoskeletal regulation, nuclear import, transcriptional regulation, and  
77 ubiquitination. PUB-ARM proteins have been implicated in plant receptor-like kinase (RLK)  
78 signalling, with the ARM repeat domain mediating the binding of PUBs to the kinase domain  
79 (Gu et al., 1998; Samuel et al., 2006).

80 E3 ligases have been shown to play roles in the establishment of legume-rhizobium  
81 symbiosis (reviewed in Hervé et al., 2011). *M. truncatula* *LIN* (Kiss et al., 2009) and the  
82 orthologous gene from *L. japonicus*, *CERBERUS* (Yano et al., 2009), encode E3 ligases  
83 containing U-box, ARM and WD-40 repeats, and have been reported to control rhizobial  
84 infection inside root hairs. A second PUB-ARM E3 ubiquitin ligase in *M. truncatula*, *MtPUB1*,  
85 was identified as a negative regulator of nodulation by direct interaction with the receptor-like  
86 kinase LYK3 (Mbengue et al., 2010). *M. truncatula* PUB1 is required for both rhizobial and  
87 arbuscular mycorrhiza (AM) endosymbiosis as it also directly interacts with the receptor kinase  
88 DMI2, a key component of the common symbiosis signalling pathway (Vernié et al., 2016). A  
89 member of the SEVEN IN ABSENTIA (SINA) family of E3 ligases, SINA4, was shown to  
90 interact with SYMRK receptor-like kinase in *L. japonicus* and be a negative regulator of  
91 rhizobial infection (Den Herder et al., 2012). *LjnsRING*, a RING-H2 E3 ubiquitin ligase from  
92 *L. japonicus*, was also reported to be required for both rhizobial infection and nodule function  
93 (Shimomura et al., 2006). Nevertheless, the mechanistic mode of action of the E3 ligases in the  
94 symbiotic interactions has not been elucidated.

95 Here, we report the involvement of a PUB-ARM protein, *LjPUB13*, in the symbiotic  
96 interaction of *L. japonicus* with rhizobia. *LjPUB13* is phylogenetically a close relative of  
97 *Arabidopsis* PUB13, which has been implicated in plant responses to bacterial flagellin (flg22)  
98 (Lu et al., 2011) and, very recently, fungal long-chain chitooligosaccharides (chitooctose)  
99 (Liao et al., 2017). In *L. japonicus*, *LjPUB13* is involved in the establishment of a successful  
100 symbiosis, through the interaction of its ARM domain with the Nod factor receptor NFR5 and  
101 direct ubiquitination of the NFR5 kinase domain.

102

103

## 104 MATERIALS AND METHODS

105

### 106 Biological material, growth conditions and inoculation

107 *L. japonicus* ecotype Gifu B-129 was used as a wild type control. Wild type, *pub13* and  
108 *har1-3* (Krusell et al., 2012) seeds were surface-sterilized as previously described (Handberg  
109 & Stougaard, 1992) and were grown on wet filter paper for 3 to 4 days. Plants were then grown  
110 in petri dishes with solid quarter-strength B&D medium (Broughton & Dilworth, 1971) on filter  
111 paper. The plants were grown in a vertical position in growth boxes, keeping the roots in the  
112 dark. Growth chamber conditions were 16-h day and 8-h night cycles at 21°C.

113 For nodulation kinetics and IT counting, each petri dish was inoculated with 500 µl of a  
114 0.02 OD<sub>600</sub> culture of *Mesorhizobium loti* cv. R7A DsRed (Kawaharada et al., 2015). Nodule  
115 numbers were scored on at least 30 plants and ITs were counted on at least 30 cm of root.

116 For gene expression analyses the plants were grown in pots with 2:1 mix of sand and  
117 vermiculite. Half of the plants were inoculated with a 0.1 OD<sub>600</sub> culture of *M. loti* cv. R7A. The  
118 plants were watered periodically with Hoagland nutrient solution.

119

## 120 **Protein purification**

121 For GST-*Lj*PUB13, GST-*Lj*BAK1<sub>cyt</sub>, and GST-*Lj*FLS2<sub>cyt</sub>, the corresponding ORFs were  
122 PCR amplified and the resulting fragments were cloned between the EcoRI and XhoI sites of  
123 pGEX-6P-1 (GE Healthcare). For HIS-*Lj*PUB13, the ORF was PCR amplified and the resulting  
124 fragment was cloned between the EcoRI and XhoI sites of pET21a (Novagen). Primers are  
125 listed in Table S1. GST- and HIS- tagged proteins were expressed in *E. coli* Rosetta (DE3)  
126 (Merck Chemicals). GST-tagged proteins were then purified with Glutathione-Sepharose 4B  
127 beads (GE Healthcare) and eluted with 0.2 M reduced glutathione, whilst HIS-tagged proteins  
128 were purified with Ni Sepharose High Performance beads (GE Healthcare) and eluted with 250  
129 mM imidazole.

130 Plasmids with the *NFR1*<sub>cyt</sub> and *NFR5*<sub>cyt</sub> fragments cloned in pProEX-1 vector were kindly  
131 provided by Mickael Blaise. HIS-NFR1<sub>cyt</sub> and HIS-NFR5<sub>cyt</sub> proteins were expressed in Rosetta  
132 2 *E. coli* (DE3) competent cells (Novagen). IMAC purification was performed using Ni-NTA  
133 columns (Qiagen). The proteins were eluted with an elution buffer containing 50 mM Tris-HCl  
134 pH 8, 500 mM NaCl, 500 mM imidazole pH 8, 1 mM benzamidine, 5 mM β-mercaptoethanol  
135 and 10% glycerol. The eluted proteins were then injected onto a Superdex 200 increase 10/300  
136 GL (GE Healthcare) column connected to an ÄKTA PURIFIER system (GE Healthcare) and  
137 eluted with a buffer containing 50 mM Tris-HCl pH 8, 500 mM NaCl, 5 mM β-mercaptoethanol  
138 and 10% glycerol.

139

## 140 ***In vitro* ubiquitination assay**

141 The *in vitro* ubiquitination assays were performed with an Ubiquitinylation kit (BML-  
142 UW9920, Enzo Life Sciences), using either UbcH6 or UbcH5b E2 enzymes and following the  
143 manufacturer's protocol. For *Lj*FLS2 ubiquitination tests UbcH5c E2 enzyme was also used.

144 All the reactions were incubated at 30°C for 3 hrs, and then stopped by adding SDS  
145 sample buffer and boiled at 98°C for 5 min. The samples were then separated by SDS-PAGE  
146 and analyzed by Western blotting, using the  $\alpha$ -GST antibody (GE Healthcare) and the  $\alpha$ -HIS  
147 antibody (Roche) to detect the tagged proteins or the anti-ubiquitin antibody (Santa Cruz  
148 Biotechnology P4D1) to detect the ubiquitinated fraction.

149

### 150 ***In vitro* binding assay**

151 For the *in vitro* binding assays, 2  $\mu$ g of a GST tagged protein was incubated with 2  $\mu$ g of  
152 a HIS tagged protein, in different protein combinations, in 150  $\mu$ l of cold buffer A (50 mM Tris-  
153 HCl pH 7.5, 100 mM NaCl, 10% glycerol) with 0.1 % Triton X-100, for 1.5 hrs at 4°C.  
154 Glutathione-Sepharose 4B beads (GE Healthcare) were added to the mixtures and incubated  
155 with the proteins for 2 more hrs at 4°C. The beads were then washed 3 times with cold buffer  
156 A. The bead-bound proteins were analysed by immunoblotting, according to standard protocols,  
157 using anti-GST (GE Healthcare) and anti-HIS (Roche) antibodies.

158

### 159 **Expression analysis by qRT-PCR**

160 To test the temporal and spatial expression of *LjPUB13* in non-inoculated and *M. loti*  
161 inoculated *L. japonicus* plants and the expression of defence genes after treatment with flg22,  
162 analysis by qRT-PCR was performed as previously described (Kawaharada et al., 2015; Tanou  
163 et al., 2015). Gene primers are listed in Supplementary Table S2.

164

### 165 ***LjPUB13* Promoter Activity in *L. japonicus***

166 For the promoter-GUS-terminator construction, a 1475 bp promoter with a 5' untranslated  
167 region (UTR) and a 310 bp terminator region was amplified from *L. japonicus* genomic DNA  
168 (the primers are listed in Table S3) and cloned into GoldenGate vectors (Weber et al., 2011).



169 The PCR fragments were firstly cloned into GoldenGate Level 0 vectors before being  
170 assembled as a construct (promoter:GUS:terminator) in a modified pIV10 vector (Stougaard et  
171 al., 1987). The construct was transferred into *A. rhizogenes* AGL1.

172 Hairy root induction using *A. rhizogenes* was performed as described previously (Hansen  
173 et al., 1989). Chimeric plants were transferred into magenta growth boxes containing a  
174 sterilized 4:1 mix of clay granules and vermiculite as well as ¼ strength B&D medium  
175 supplemented with 1 mM KNO<sub>3</sub>. For inoculation, liquid cultures of *M. loti* cv. R7A expressing  
176 DsRed were grown to an optical density of 0.02 and applied directly to the root systems (0.7  
177 ml per plant). Plants were grown at 21°C (16 h light, 8 h dark) and harvested at indicated times  
178 post inoculation. GUS staining was performed as described previously (Vitha et al., 1995).  
179 Whole roots were visualized on a Leica M165 FC stereomicroscope.

180

### 181 **Infection thread formation**

182 For inspection of infection-thread formation, roots were harvested 10 and 14 days after  
183 inoculation with *M. loti* strain cv. R7A DsRed. Sections (1 cm) of at least 30 plants were  
184 examined under a Zeiss Axioplan 2 fluorescent microscope.

185

### 186 **ROS accumulation**

187 Seven-day-old roots were cut into 0.5 cm pieces and incubated overnight (with shaking)  
188 in 200 µl water in 96-well plates (Grenier Bio-one). Before the measurements, the water was  
189 exchanged with 200 µl of buffer (20 mM luminol, Sigma; 5 µg/ml horseradish peroxidase,  
190 Sigma), supplemented with either H<sub>2</sub>O or 0.5 µM flg22 peptide (FLS22-P-1, Alpha Diagnostic).  
191 Luminescence was recorded with a Varioskan<sup>TM</sup> Flash Multimode Reader (Thermo).

192

### 193 **Protein-protein interaction studies by Bimolecular Fluorescence complementation (BiFC)**

194 The ARM domain of *LjPUB13* (Fig. S2) and the full length *LjBAK1* were cloned, using  
195 Gateway technology (Invitrogen), into the pGREEN029:35S:GW:nYFP/cYFP vectors creating  
196 N- and C-terminal fusions to YFP. The primers are listed in Table S3. The NFR1 and NFR5  
197 fused to nYFP/cYFP constructs used were the same as those described in Madsen et al., 2011.

198 *Agrobacterium tumefaciens* AGL1 cells transformed with the protein expression plasmids  
199 were grown in 5 ml LB medium supplemented with appropriate antibiotics at 28°C. Bacteria  
200 were pelleted by centrifugation at 4000 g for 20 min at room temperature and re-suspended in  
201 agroinfiltration medium (10 mM MgCl<sub>2</sub>, 10 mM MES and 450 µM acetosyringone), incubated  
202 for 2-3 hrs in the dark and finally re-suspended to an OD<sub>600</sub> of 0.2. A 1:1 mixture of cultures  
203 was prepared for each construct combination together with the P19 construct (to an OD<sub>600</sub> of  
204 0.02). A 1-ml syringe was used for infiltration of the bacterial mixture to the abaxial side of the  
205 *Nicotiana benthamiana* leaves. Fluorescence was detected using a Zeiss LSM510 confocal  
206 microscope.

207

## 208 **Statistical analyses**

209 Differences in the tested biological parameters between mutant and wild type plants were  
210 analyzed by Student's t-test. A significant level of 5% was applied.

211

## 212 **ACCESSION NUMBERS**

213 The *LjPUB13* sequence is available in GenBank under the accession number KY131979 and  
214 in *Lotus* base v.3.0 (<https://lotus.au.dk/>) as Lj3g3v3189730.1. Other sequence data from this  
215 article can be found in the GenBank under the following accession numbers: *LjBAK1*  
216 (KY131980), *LjFLS2* (JN099749), *NFR1* (AJ575249), *NFR5* (AJ575255)

217

218

## 219 RESULTS

220

### 221 *LjPUB13* encodes an active E3 ligase

222 A *Lotus japonicus* sequence encoding for a novel ARMADILLO repeat-containing  
223 protein was initially identified as the TC63883 in the DFCI Gene Index Database  
224 (<http://compbio.dfci.harvard.edu/tgi/tgipage.html>), while searching for ARMADILLO repeat  
225 proteins in *L. japonicus*. Initial search at transcript data in *Lotus* Base (<https://lotus.au.dk>)  
226 showed that this gene is expressed in nodules. The predicted protein has a typical Plant U-box  
227 (PUB) E3 ubiquitin ligase sequence with a U-box motif followed by a C-terminal  
228 ARMADILLO (ARM) repeat domain (Fig. 1A). It encodes a 671 aminoacid long protein with  
229 an estimated molecular mass of 73kDa. Phylogenetic analysis showed that this protein is  
230 distinct from other previously characterised PUBs in legumes, but it is the closest homolog to  
231 *Arabidopsis thaliana* PUB13 (Fig. S1, S2). We therefore designated the protein as *LjPUB13*.  
232 The encoded polypeptide shares 69% and 65% amino acid identity with *AtPUB13*  
233 (AT3G46510) and *AtPUB12* (AT2G28830), respectively. At the genomic level, this gene  
234 displays an exon-intron structure similar to *AtPUB13* (Li *et al.*, 2012), but different from  
235 *AtPUB12* ([www.arabidopsis.org](http://www.arabidopsis.org)), with four exons spanning a 4547 bp region on chromosome  
236 3 (Fig. 1A).

237 The predicted E3 ligase enzymatic activity of *LjPUB13* was analysed by an *in vitro*  
238 ubiquitination assay, performed with *LjPUB13* purified as a glutathione S-transferase (GST)  
239 fusion protein from *Escherichia coli*. Incubation of *LjPUB13* with E1 ubiquitin-activating and  
240 E2 ubiquitin-conjugated enzymes, ubiquitin and ATP resulted in *LjPUB13* polyubiquitination  
241 (Fig. 1B). Bands with a larger molecular weight than *LjPUB13*-GST and a protein ladder were  
242 detected by anti-GST and anti-ubiquitin antibodies, respectively, when *LjPUB13* was added to  
243 the reaction (Fig. 1B, lane 4). The observed E3 ligase activity was abolished in the absence of

244 E1 or E2 enzymes (Fig. 1B, lanes 1 & 2). These results show that *L. japonicus* PUB13 is a  
245 functional E3 ligase, possessing auto-ubiquitination activity.

246

### 247 **The expression of *LjPUB13* is symbiotically regulated**

248 To test if *LjPUB13* is regulated during symbiosis, we monitored its transcript levels in  
249 roots and nodules at 7, 14, 21 and 28 days post inoculation (dpi) with *Mesorhizobium loti*. No  
250 significant increase was detected in inoculated plants compared to uninoculated ones.  
251 Functional nodules, in general, had approximately 2 times less *LjPUB13* transcript compared  
252 to roots (Fig. 2A).

253 To complement the results from gene transcript analysis, we constructed a  
254 *LjPUB13<sub>pro</sub>::GUS* fusion and analysed the spatial and temporal regulation of *LjPUB13*  
255 promoter activity in *Agrobacterium rhizogenes* transformed roots expressing the transgene. In  
256 both uninoculated and inoculated roots, the *LjPUB13* promoter was active throughout the whole  
257 root, but strongest in the vascular bundle (Fig. 2B) and at the lateral root initiation sites (Fig.  
258 2C). In *M. loti* inoculated plants, an increase in the promoter activity in the root zones, where  
259 nodule primordia formation occurs, was observed (Fig. 2D). Although strong  
260 *LjPUB13<sub>pro</sub>::GUS* expression was detected in young developing nodules at 7 dpi (Fig. 2D), in  
261 the fully developed mature nodules (28 dpi), *LjPUB13<sub>pro</sub>::GUS* expression was restrained to  
262 the nodule-root connection zone (Fig. 2F). Collectively, these results illustrate that *LjPUB13*  
263 transcription is present in symbiotically active root and young nodule tissues.

264

### 265 ***Ljpub13* mutants display growth defects and a delayed and reduced nodulation capacity**

266 To investigate whether *LjPUB13* plays a role in the interaction between *L. japonicus*  
267 and the *M. loti* symbiont, we identified three mutant lines that possess LORE1 retroelement  
268 insertions (Fukai *et al.*, 2012; Urbanski *et al.*, 2012) in *LjPUB13* (Fig. 1A) and homozygous

269 insertion lines were obtained for phenotypic analyses. The expression levels of *LjPUB13* in  
270 uninoculated plants of *pub13.1*, *pub13.2* and *pub13.3* mutant lines are 4-, 4.5- and 19-fold  
271 reduced, respectively, compared to wild-type plants of the same age (Fig. S3).

272 We observed that in the absence of the *M. loti* symbiont, *L. japonicus pub13* mutants  
273 displayed a reduced growth phenotype; the root and shoot length are significantly shorter in all  
274 *pub13* mutants when compared to wild type plants of the same age (Fig. 3). In the presence of  
275 *M. loti*, *pub13* mutants formed a lower number of nodules compared to the wild type Gifu, both  
276 in absolute number (Fig. 4A) and when normalized to root length (Fig. 4B). The latter indicates  
277 that the reduced nodulation phenotype does not correlate to the shorter root phenotype and is  
278 further supported by the direct comparison of *pub13.1* with the *har1* hypernodulation mutant  
279 (Krusell et al., 2012; Nishimura et al., 2002), where in *har1* very short roots (shorter than  
280 *pub13.1*) a high number of nodules is formed (Fig. S4). Notably, nodulation was not only  
281 significantly reduced but also delayed in *pub13* mutants (Fig. 4C, Fig. S5). At 14 dpi only 15%  
282 of *pub13-1* and *pub13-2* plants and 22% of *pub13-3* plants had initiated symbiosis and had  
283 nodules compared to approximately 60% of wild type plants. This frequency in nodule  
284 appearance in the different plants of each plant line was higher at later stages of nodulation; at  
285 28 dpi 50% of *pub13-1* and almost 80% and 90% of *pub13-2* and *pub13-3* plants, respectively,  
286 formed at least 1 nodule (Fig. 4C). Sections of mature nodules showed that they were fully  
287 infected and morphologically normal (Fig. S6). In addition, the root infection process was not  
288 evidently perturbed in the *L. japonicus pub13* mutants since both wild type plants and *pub13*  
289 mutants formed a similar number of infection threads in root hairs (Fig. 4D). Together, these  
290 results show that *LjPUB13* is involved in plant growth and nodule organogenesis.

291

292 ***L. japonicus pub13* mutants display normal root PTI responses to flg22 treatment**

293           Based on its gene structure, amino acid identity and phylogenetic relationship, *LjPUB13*  
294 could be considered a putative ortholog of *AtPUB13* in *L. japonicus*. In *Arabidopsis*, a number  
295 of phenotypes have been reported for *Atpub13* mutants, which primarily indicates for a role in  
296 PTI (pathogen-associated molecular patterns (PAMP)/pattern-triggered immunity) response to  
297 flg22 treatment (Lu et al., 2011, Zhou et al., 2015). Although the studies in *Arabidopsis* were  
298 focused in leaves, we searched for similar functions in *L. japonicus* roots as our aim was to  
299 investigate the function of *LjPUB13* in root responses to interacting microbes or microbial  
300 signals.

301           Firstly, we investigated the involvement of *LjPUB13* in the induction of reactive oxygen  
302 species (ROS) after flg22 treatment. Our analysis of wild type and *pub13* mutant roots revealed  
303 that similar levels of ROS were produced by wild type and mutant *L. japonicus* plants after  
304 treatment with 0.5  $\mu$ M flg22 (Fig. S7).

305           Secondly, we analysed the transcriptional activation of defence marker genes *LjMPK3*,  
306 *LjPEROXIDASE* and *LjPRI*, together with *LjFLS2* and *LjBAK1* after 1-hour treatment with  
307 flg22. All marker genes were induced in the treated samples (Fig S8); *LjMPK3*,  
308 *LjPEROXIDASE* and *LjPRI* had a 4- to 6-fold increase in transcript levels while a 2- to 3-fold  
309 increase was observed for *LjFLS2* and *LjBAK1*. Nevertheless, the expression levels of these  
310 marker genes were comparable in wild type and *pub13* mutants in both treated and non-treated  
311 samples (Fig. S8), suggesting that *L. japonicus pub13* mutants neither express immunity-related  
312 genes constitutively nor overexpress them in the presence of flg22 as seen in *Arabidopsis*  
313 mutants (Lu et al., 2011).

314           Collectively, these results show that in *L. japonicus* roots the *PUB13* gene is not directly  
315 involved in PTI responses induced by flg22.

316

317 ***Lotus* PUB13 interacts with *LjBAK1* but fails to ubiquitinate *LjFLS2***

318 It is known that in *Arabidopsis*, PUB13, phosphorylated by BAK1 in the presence of  
319 flg22, polyubiquitinates the FLS2 receptor. This results in FLS2 degradation and regulation of  
320 the PTI signalling downstream of FLS2-BAK1 (Lu et al., 2011). The apparent absence of  
321 PUB13-dependent PTI responses in *L. japonicus* roots prompted us to investigate the molecular  
322 basis of this differential response in *L. japonicus*.

323 We identified the corresponding *L. japonicus* BAK1, and the *Lj*BAK1<sub>cyt</sub>-GST or  
324 *Lj*FLS2<sub>cyt</sub>-GST fusion proteins were produced in *E. coli*. Next, we investigated the ability of  
325 the *Lj*PUB13-HIS protein to interact with *Lj*BAK1 by performing an *in vitro* binding assay.  
326 (Similar to *Arabidopsis* (Lu et al., 2011), we observed that *Lj*PUB13 interacts with *Lj*BAK1,  
327 while the *Lj*PUB13-*Lj*FLS2 interaction is barely detectable (Fig. 5A). *Lj*PUB13 appears to not  
328 to be able to ubiquitinate *Lj*FLS2<sub>cyt</sub>, although we tested potential capacity in the presence of  
329 three different E2 enzymes (Fig. S9). These results indicate that PUB13 has different molecular  
330 capacities in *L. japonicus* and *Arabidopsis*.

331

### 332 ***L. japonicus* PUB13 interacts with and ubiquitinates NFR5**

333 Since *LjPUB13* is transcriptionally regulated during symbiosis and the gene is  
334 implicated in sustained nodule organogenesis, we explored the involvement of *Lj*PUB13 in Nod  
335 factor signalling. Thus, we tested the possibility of *Lj*PUB13 to interact with the Nod factor  
336 receptors NFR1 and NFR5.

337 First, we investigated these supposed interactions *in vitro*. The cytoplasmic regions of  
338 NFR1 or NFR5 were expressed in *E. coli* as fusions to a HIS tag and were used in an *in vitro*  
339 binding assay together with the *Lj*PUB13-GST fusion protein. We found that *Lj*PUB13  
340 interacted strongly with NFR5<sub>cyt</sub>, while the *Lj*PUB13-NFR1<sub>cyt</sub> interaction was usually  
341 undetectable (Fig. 5B). Sometimes a weak interaction of *Lj*PUB13-NFR1<sub>cyt</sub> was observed but  
342 this result was not always reproducible, and therefore cannot be fully considered as possible.

343 Moreover, we tested whether *L. japonicus* BAK1, can interact with the receptors NFR1 and  
344 NFR5. *LjPUB13* strongly interacts with *LjBAK1* and it is plausible that *LjPUB13* acts together  
345 with *LjBAK1* as a complex. In addition, BAK1 is a well-known membrane co-receptor for  
346 many membrane receptor kinases (Chinchilla et al., 2009). Thus, in *in vitro* binding assays,  
347 GST-*LjBAK1*<sub>cyt</sub> was indeed found to interact with HIS-NFR5<sub>cyt</sub> but no interaction was observed  
348 between GST-*LjBAK1*<sub>cyt</sub> and HIS-NFR1<sub>cyt</sub> (Fig. 5B).

349 We verified the interaction of *LjPUB13* with the Nod factor receptors, using a BiFC  
350 assay in *Nicotiana benthamiana*. Since the ARM domain of PUB13 is responsible for the  
351 specificity in protein-protein interactions of E3 ligases, we created a truncated fusion protein,  
352 where only the ARM domain of *LjPUB13* (Fig. S2) was linked to N- or C-terminal half of YFP.  
353 We observed a strong reconstituted YFP signal on *N. benthamiana* leaf cells when *LjPUB13*<sub>ARM</sub>  
354 was co-expressed with *LjBAK1*, NFR1 or NFR5 (Fig. 6). Two other receptor-like kinases,  
355 *LjCLAVATA2* (Krusell et al., 2011) and *LjLYS11* (Rasmussen et al., 2016), were used as  
356 negative control interactions. Indeed, no YFP signal was detected when *LjPUB13*<sub>ARM</sub> was co-  
357 expressed with either of the two control proteins. These results show that the ARM domain of  
358 *LjPUB13* can recognize and interacts with *L. japonicus* receptor kinases in a specific manner.  
359 In addition, the *LjBAK1*-NFR5 interaction was also confirmed by BiFC *in planta* (Fig. 6).

360 Finally, we examined whether *LjPUB13* can ubiquitinate the Nod factor receptors NFR1  
361 and NFR5 since *LjPUB13* was shown to be a functional E3 ligase (Fig. 1B). The *E. coli*-  
362 produced HIS-NFR1<sub>cyt</sub> or HIS-NFR5<sub>cyt</sub> fusion proteins were used together with GST-*LjPUB13*  
363 in an *in vitro* ubiquitination assay. Interestingly, *LjPUB13* polyubiquitinated the cytosolic  
364 region of NFR5 and we detected high-molecular-weight proteins above the HIS-NFR5<sub>cyt</sub> (Fig.  
365 7). The NFR5 ubiquitination by *LjPUB13* was demonstrated by using two different E2  
366 enzymes, UbcH6 and UbcH5b. On the contrary, when HIS-NFR1<sub>cyt</sub> was tested as a substrate



367 of *LjPUB13*, no ubiquitination activity was observed (Fig. 7). Thus, *L. japonicus* PUB13  
368 specifically ubiquitinates the Nod factor receptor NFR5.

369

370

## 371 **DISCUSSION**

372

373 E3 ligases were identified as important signalling components in nitrogen-fixing  
374 symbiosis in model legumes (Shimomura et al., 2006; Kiss et al., 2009; Yano et al., 2009;  
375 Mbengue et al., 2010; Den Herder et al., 2012, Vernié et al., 2016). However, the targets of all  
376 the symbiotic E3 ligases remain to be identified and the signalling events downstream of their  
377 action remain unexplored. Here, we report that a PUB-ARM E3 ligase that possesses  
378 ubiquitination activity (Fig. 1) plays a direct role in Nod factor signalling in *Lotus japonicus*,  
379 through its interaction and ubiquitination of the Nod factor receptor NFR5. *LjPUB13* is, thus,  
380 involved in the successful establishment of *L. japonicus*-rhizobium symbiosis, likely  
381 modulating the NFR5 protein levels or activity.

382 We found that *L. japonicus* PUB13 is involved in the successful formation of nitrogen-  
383 fixing nodules. All three *pub13* mutant alleles displayed reduced and delayed nodule  
384 organogenetic capacity (Fig. 4). On the other hand, bacterial infection inside root hairs was  
385 normally sustained (Fig. 4D). This suggests that *LjPUB13* is required for the signalling events  
386 that lead to nodule organogenesis in the cortex, rather than the infection events. Furthermore,  
387 considering the low accumulation of *LjPUB13* gene transcripts in mature nodules (Fig. 2) and  
388 the successful colonization of nodules by rhizobium in the *pub13* mutants (Fig. S6), we envision  
389 that PUB13 E3 ligase plays a role in the initial stages of *L. japonicus*-rhizobium symbiosis  
390 establishment, rather than the later stages of nodule development and colonization.

391 The reduced nodulation phenotype could be attributed to the general reduced plant  
392 growth exhibited by *pub13* mutants (Fig. 3). However, the number of nodules was significantly  
393 different in *pub13* mutants from that of the wild-type plants also when expressed per unit of  
394 root length (Fig. 4B). This strongly suggests that a reduced nodulation is not directly related to  
395 a shorter root. The fact that the nodulation capacity is independent of the shoot/root length is  
396 further supported by studies in hypernodulation mutants, like *har1* (Krusell et al., 2012;  
397 Nishimura et al., 2002), where an excessive number of nodules are produced by a very short  
398 plant (Fig. S4). Moreover, RNAi knockdown of *LjnsRING* E3 ligase, a nodule-specific gene  
399 involved in the early infection and mature nodule function (Shimomura et al., 2006), and  
400 mutation of *Amsh1*, a deubiquitination enzyme (Malolepszy et al., 2015), affect plant growth  
401 in *L. japonicus*; this indicates that some proteins involved in (de)ubiquitination may act as nodes  
402 for plant growth and nodulation pathways. This is further supported by the expression of  
403 *LjPUB13* observed in developing lateral roots at non-inoculated plants (Fig. 2C). The growth  
404 defective phenotype of *L. japonicus pub13* mutants has also been reported for the *Arabidopsis*  
405 *pub13* mutants (Antignani et al., 2015).

406 The expression of *LjPUB13* observed in nodule primordia (Fig. 2), together with the  
407 findings that *LjPUB13* interacts with (Fig. 5, 6) and directly ubiquitinates the NFR5 receptor  
408 (Fig. 7), strongly supports the requirement for *LjPUB13* during the early stages of nodule  
409 organogenesis in *L. japonicus*-rhizobia symbiosis. The defective nodulation phenotype  
410 observed in *pub13* mutants suggests a positive regulatory role of *LjPUB13* in rhizobial  
411 symbiosis. On the contrary, the symbiotic E3s *MtPUB1* and *SINA4* (Mbengue et al., 2010; Den  
412 Herder et al., 2012) exhibit a clear negative role on the early steps of the infection process. This  
413 indicates that different roles may be performed by various E3 ligases during symbiosis.

414 *LjPUB13* is the closest putative ortholog of *Arabidopsis PUB13* in *L. japonicus*. In  
415 *Arabidopsis*, *PUB13* has been implicated in FLS2-mediated flg22 signalling (Lu et al., 2011;

416 Zhou et al., 2015) and, recently, in LYK5-mediated chitooctose responses (Liao et al., 2017).  
417 We show here that the defence responses downstream of flg22 perception are independent of  
418 PUB13 in the roots of this model legume. In contrast to what has been reported for *Arabidopsis*  
419 leaves (Lu et al., 2011; Zhou et al., 2015), our results from ROS production, and defence gene  
420 regulation (Fig. S7, S8) show that *LjPUB13* does not appear to be involved in flg22-dependent  
421 defence responses in *L. japonicus* roots. In line with this, our *in vitro* assays show that *LjPUB13*  
422 may not directly ubiquitinate *LjFLS2* (Fig. S9), as has been shown for its *Arabidopsis*  
423 counterpart (Lu et al., 2011). However, we cannot rule out that the involvement of *LjPUB13* in  
424 plant immunity may be manifested in other parts of the plant or under conditions that have not  
425 been addressed in this study.

426 The differences observed in plant immunity responses in *L. japonicus pub13* mutant  
427 lines compared to *Arabidopsis* mutants, could be attributed to a host-dependent specialisation  
428 of function for these PUB proteins. Functional differentiation of orthologous PUB genes was  
429 also found for *Arabidopsis PUB17* and *Brassica napus ARC1* (Yang et al., 2006). Alternatively,  
430 a redundancy in the roles of PUB proteins in *L. japonicus* could mean that paralogs may be  
431 responsible for the roles that have been assigned to PUB13 in *Arabidopsis*. Blast analyses  
432 against *L. japonicus* PUB13 in *Lotus* base v.3.0 revealed the presence of, yet uncharacterized,  
433 proteins with similarity to PUB13. Proteins with highest similarity (appr. 50% identity) are  
434 presented in Fig. S1. Future studies are needed to examine possible implication of these proteins  
435 in defence responses in *L. japonicus*.

436 Based on our results, we propose a plausible mechanism where *LjPUB13* acts on NFR5  
437 post-translationally. Ubiquitination of NFR5 may lead to degradation, modulation of activity  
438 or re-localization. In any case, it is expected that NFR5 turnover is essential for efficient nodule  
439 organogenesis, and the recruitment of *LjPUB13* ensures the onset and/or continuation of NFR5-  
440 mediated signalling and the successful initiation of nodule formation.

441           Along this line, and although NFR5 internalization from the plasma membrane has not  
442    been shown directly as yet, an association of NFR5 with the clathrin-mediated endocytosis has  
443    been proposed (Wang et al., 2015b). A clathrin protein (CHC1) was shown to interact with the  
444    Rho-like GTPase ROP6 (Wang et al., 2015a), an interacting partner of NFR5 (Ke et al., 2012)  
445    in *L. japonicus*. Interestingly, *ROP6* silencing in roots by RNAi did not affect the rhizobium  
446    entry in root hairs, but inhibited the IT growth through the root cortex, which resulted in the  
447    development of fewer nodules per plant (Ke et al., 2012).

448           We also show that *LjPUB13* physically and specifically interacts with the cytosolic  
449    regions of *LjBAK1* and NFR5 *in vitro* and *in vivo*. Interestingly, the cytosolic region of *LjBAK1*  
450    was also shown to interact with the cytosolic region of NFR5 (Fig. 5 and 6), suggesting that  
451    PUB13/BAK1 may act as a complex in the establishment of *L. japonicus*-rhizobium symbiosis.  
452    The recruitment of *LjBAK1* in this case is anticipated, considering the ubiquitous role of BAK1  
453    in interactions of multiple membrane receptors kinases (Chinchilla et al., 2009; Lu et al., 2011).

454           In conclusion, based on the knowledge that both ubiquitination and deubiquitination of  
455    proteins play a major role in root nodule symbiosis (Shimomura et al., 2006; Kiss et al., 2009;  
456    Yano et al., 2009; Mbengue et al., 2010; Den Herder et al., 2012; Malolepszy et al., 2015;  
457    Vernié et al., 2016) and on the results presented here, we suggest that *LjPUB13* has a role in  
458    the establishment of the *L. japonicus*-rhizobium symbiosis and acts as a positive regulator in  
459    nodule formation through the post-transcriptional control of NFR5.

460

#### 461    **ACKNOWLEDGEMENTS**

462    This work was partially supported by the Postgraduate Programs 3817 & 3439 of the  
463    Department of Biochemistry and Biotechnology, University of Thessaly (to KKP). DT and SR  
464    were supported by the Danish National Research Foundation grant no. D NRF79. DT was  
465    supported by a STSM (290713-031130) from Cost Action FA1103. The authors wish to thank

466 Prof. Jens Stougaard (Aarhus University) for scientific support and for making corrections and  
467 comments on the manuscript; and Prof. Claus Schwechheimer (Technische Universität  
468 München) for hosting DT in his laboratory by providing financial support through the SFB924  
469 and for making comments on the manuscript. The authors thank Mickael Blaise for providing  
470 the plasmids for HIS-NFR1<sub>cyt</sub> and HIS-NFR5<sub>cyt</sub> protein expression, Zoltán Bozsóki for helping  
471 with the ROS assay, and Finn Pedersen for taking care of the plants in the greenhouse.

472

473

## 474 REFERENCES

475

476 Antignani V., Klocko A.L., Bak G., Chandrasekaran S.D., Dunivin T., & Nielsen E. (2015)  
477 Recruitment of PLANT U-BOX13 and the PI4Kb1/b2 phosphatidylinositol-4 kinases by the  
478 small GTPase RabA4B plays important roles during salicylic acid-mediated plant defense  
479 signaling in *Arabidopsis*. *Plant Cell* 27, 243-261.

480 Arrighi J.F., Barre A., Ben Amor B., Bersoult A., Soriano L.C., Mirabella R., ..., Gough C.  
481 (2006) The *Medicago truncatula* lysine motif receptor-like kinase gene family includes NFP  
482 and new nodule-expressed genes. *Plant Physiology* 142, 265–279.

483 Broughton W.J., & Dilworth M.J. (1971) Control of leghaemoglobin synthesis in snake beans.  
484 *Biochemical Journal*, 125, 1075–1080.

485 Chinchilla D., Shan L., He P., de Vries S., & Kemmerling B. (2009) One for all, the receptor-  
486 associated kinase BAK1. *Trends in Plant Science* 14, 535-541.

487 Den Herder G., Yoshida S., Antolín-Llovera M., Ried M.K., & Parniske M. (2012) *Lotus*  
488 *japonicus* E3 ligase SEVEN IN ABSENTIA4 destabilizes the symbiosis receptor-like kinase  
489 SYMRK and negatively regulates rhizobial infection. *Plant Cell* 24, 1691-1707.

- 490 Fukai E., Soyano T., Umehara Y., Nakayama S., Hirakawa H., Tabata S., ..., Hayashi M. (2012)  
491 Establishment of a *Lotus japonicus* gene tagging population using the exon-targeting  
492 endogenous retrotransposon LORE1. *Plant journal* 69, 720-730.
- 493 Groves M. R. & Barford D. (1999) Topological characteristics of helical repeat proteins.  
494 *Current Opinion in Structural Biology* 9, 383–389.
- 495 Gu T., Mazzurco M., Sulaman W., Matias D.D. & Goring D.R. (1998) Binding of an arm repeat  
496 protein to the kinase domain of the S-locus receptor kinase. *Proceedings of the National*  
497 *Academy of Sciences U S A* 95, 382-387.
- 498 Handberg K. & Stougaard J. (1992) *Lotus japonicus*, an autogamous, diploid legume species  
499 for classical and molecular genetics. *The Plant Journal* 2, 487-496.
- 500 Hansen J., Jørgensen J.E., Stougaard J. & Marcker K. (1989) Hairy roots - a short cut to  
501 transgenic root nodules. *Plant Cell Reports* 8, 12–15.
- 502 Hershko A. & Ciechanover A. (1998) The ubiquitin system. *Annual Review of Biochemistry*  
503 67, 425-479.
- 504 Hervé C., Lefebvre B. & Cullimore J. (2011) How many E3 ubiquitin ligase are involved in the  
505 regulation of nodulation? *Plant Signaling & Behavior* 6, 660-664.
- 506 Kawaharada Y., Kelly S., Nielsen M.W., Hjuler C.T., Gysel K., Muszyński A., ..., Stougaard J.  
507 (2015) Receptor-mediated exopolysaccharide perception controls bacterial infection. *Nature*  
508 523, 308-312.
- 509 Ke D., Fang Q., Chen C., Zhu H., Chen T., Chang X., ..., Zhang, Z. (2012) The small GTPase  
510 ROP6 interacts with NFR5 and is involved in nodule formation in *Lotus japonicus*. *Plant*  
511 *Physiology* 159,131-143.

- 512 Kiss E., Oláh B., Kaló P., Morales M., Heckmann A.B., Borbola A., ..., Endre G. (2009) LIN,  
513 a novel type of U-box/WD40 protein, controls early infection by rhizobia in legumes. *Plant*  
514 *Physiology* 151, 1239-1249.
- 515 Komander D. (2009) The emerging complexity of protein ubiquitination. *Biochemical Society*  
516 *Transactions* 37, 937-953.
- 517 Krusell L., Sato N., Fukuhara I., Koch B.E., Grossmann C., Okamoto S., ..., Stougaard J. (2011)  
518 The *Clavata2* genes of pea and *Lotus japonicus* affect autoregulation of nodulation. *Plant*  
519 *Journal* 65, 861-871.
- 520 Krusell L., Madsen L.H., Sato S., Aubert G., Genua A., Szczyglowski K., ..., Stougaard, J.  
521 (2002) Shoot control of root development and nodulation is mediated by a receptor-like kinase.  
522 *Nature* 420, 422-426.
- 523 Li W., Ahn I.P., Ning Y., Park C.H., Zeng L., Whitehill J.G.A., ..., Wang G.L. (2012) The U-  
524 Box/ARM E3 ligase PUB13 regulates cell death, defense, and flowering time in Arabidopsis.  
525 *Plant Physiology* 159, 239-250.
- 526 Liao D., Cao Y., Sun X., Espinoza C., Nguyen C., Liang, Y. & Stacey, G. (2017) Arabidopsis  
527 E3 ubiquitin ligase PLANT U-BOX13 (PUB13) regulates chitin receptor LYSIN MOTIF  
528 RECEPTOR KINASE5 (LYK5) protein abundance. *New Phytologist* 214, 1646-1656.
- 529 Limpens E., Franken C., Smit P., Willemse J., Bisseling T. & Geurts, R. (2003) LysM domain  
530 receptor kinases regulating rhizobial Nod factor-induced infection. *Science* 302, 630–633.
- 531 Lu D., Lin W., Gao X., Wu S., Cheng C., Avila J., ..., Shan L. (2011) Direct ubiquitination of  
532 pattern recognition receptor FLS2 attenuates plant innate immunity. *Science* 332, 1439-1442.
- 533 Madsen E.B., Madsen L.H., Radutoiu S., Olbryt M., Rakwalska M., Szczyglowski K., ...,  
534 Stougaard J. (2003) A receptor kinase gene of the LysM type is involved in legume perception  
535 of rhizobial signals. *Nature* 425, 637–640.

536 Madsen E.B., Antolín-Llovera M., Grossmann C., Ye J., Vieweg S., Broghammer A., ...,  
537 Parniske M. (2011) Autophosphorylation is essential for the in vivo function of the *Lotus*  
538 japonicus Nod factor receptor 1 and receptor-mediated signaling in cooperation with Nod factor  
539 receptor 5. *Plant journal* 65,404-417.

540 Małolepszy A., Urbański D.F., James E.K., Sandal N., Isono E., Stougaard J & Andersen S.U.  
541 (2015) The deubiquitinating enzyme AMSH1 is required for rhizobial infection and nodule  
542 organogenesis in *Lotus japonicus*. *Plant Journal* 83,719-731.

543 Mbengue M., Camut S., de Carvalho-Niebel F., Deslandes L., Froidure S., Klaus-Heisen D.,  
544 ..., Lefebvre B. (2010) The *Medicago truncatula* E3 ubiquitin ligase PUB1 interacts with the  
545 LYK3 symbiotic receptor and negatively regulates infection and nodulation. *Plant Cell* 22,  
546 3474–3488.

547 Mudgil Y., Shiu S.H., Stone S.L., Salt J.N. & Goring D.R. (2004) A large complement of the  
548 predicted Arabidopsis ARM repeat proteins are members of the U-box E3 ubiquitin ligase  
549 family. *Plant Physiology* 134, 59–66.

550 Mulder L., Lefebvre B., Cullimore J. & Imberty A. (2006) LysM domains of *Medicago*  
551 *truncatula* NFP protein involved in Nod factor perception. Glycosylation state, molecular  
552 modeling and docking of chitoooligosaccharides and Nod factors. *Glycobiology* 16, 801– 809.

553 Nishimura R., Hayashi M., Wu G.J., Kouchi H., Imaizumi-Anraku H., Murakami Y., ...,  
554 Kawaguchi, M. (2002) HAR1 mediates systemic regulation of symbiotic organ development.  
555 *Nature* 420, 426-429.

556 Oldroyd G.E., Murray J.D., Poole P.S. & Downie J.A. (2011) The rules of engagement in the  
557 legume-rhizobial symbiosis. *Annual Review of Genetics* 45, 119-144.

558 Pickart C.M. & Eddins M.J. (2004) Ubiquitin, structures, functions, mechanisms. *Biochimica*  
559 *et Biophysica Acta* 1695, 55-72.



- 560 Radutoiu S., Madsen L.H., Madsen E.B., Felle H.H., Umehara Y., Grønlund M., ..., Stougaard,  
561 J (2003) Plant recognition of symbiotic bacteria requires two LysM receptor-like kinases.  
562 *Nature* 425, 585–592.
- 563 Rasmussen S.R., Füchtbauer W., Novero M., Volpe V., Malkov N., Genre A., ..., Radutoiu, S.  
564 (2016) Intraradical colonization by arbuscular mycorrhizal fungi triggers induction of a  
565 lipochitooligosaccharide receptor. *Scientific Reports* 6, 29733.
- 566 Samuel M.A., Salt J.N., Shiu S.H. & Goring D.R. (2006) Multifunctional arm repeat domains  
567 in plants. *International Review of Cell and Molecular Biology* 253, 1–26.
- 568 Shimomura K., Nomura M., Tajima S. & Kouchi H. (2006) LjnsRING, a novel RING finger  
569 protein, is required for symbiotic interactions between *Mesorhizobium loti* and *Lotus japonicus*.  
570 *Plant and Cell Physiology* 47,1572-1581.
- 571 Smalle J. & Vierstra R.D. (2004) The ubiquitin 26S proteasome proteolytic pathway. *Annual*  
572 *Review of Plant Biology* 55, 555–590.
- 573 Smit P., Limpens E., Geurts R., Fedorova E., Dolgikh E., Gough C. & Bisseling T. (2007)  
574 Medicago LYK3, an entry receptor in rhizobial nodulation factor signaling. *Plant Physiology*  
575 145, 183–191.
- 576 Stone S.L. & Callis J. (2007) Ubiquitin ligases mediate growth and development by promoting  
577 protein death. *Current Opinion in Plant Biology* 10, 624–632.
- 578 Stougaard J., Abildsten D. & Marcker K.A. (1987) The *Agrobacterium rhizogenes* pRi TL-  
579 DNA segment as a gene vector system for transformation of plants. *Molecular Genetics and*  
580 *Genomics*, 207, 251-255.
- 581 Tanou G., Minas I.S., Karagiannis E., Tsikou D., Audebert S., Papadopoulou K.K. &  
582 Molassiotis A. (2015) The impact of sodium nitroprusside and ozone in kiwifruit ripening

583 physiology, a combined gene and protein expression profiling approach. *Annals of Botany* 116,  
584 649-662.

585 Urbański D.F., Małolepszy A., Stougaard J. & Andersen S.U. (2012) Genome-wide LORE1  
586 retrotransposon mutagenesis and high-throughput insertion detection in *Lotus japonicus*. *Plant*  
587 *Journal* 69, 731-741.

588 Vernié T., Camut S., Camps C., Rembliere C., de Carvalho-Niebel F., Mbengue M., ..., Hervé  
589 C. (2016) PUB1 interacts with the receptor kinase DMI2 and negatively regulates rhizobial and  
590 arbuscular mycorrhizal symbioses through its ubiquitination activity in *Medicago truncatula*.  
591 *Plant Physiology* 170, 2312-2324.

592 Vierstra R.D. (2009) The ubiquitin–26S proteasome system at the nexus of plant biology.  
593 *Nature Reviews Molecular Cell Biology* 10, 385–397.

594 Vitha S., Benes K., Phillips J.P. & Gartland K.M. (1995) Histochemical GUS analysis. *Methods*  
595 *in Molecular Biology* 44, 185-193.

596 Wang C., Zhu M., Duan L., Yu H., Chang X., Li L., ..., Zhang Z. (2015a) *Lotus japonicus*  
597 clathrin heavy Chain 1 is associated with Rho-Like GTPase ROP6 and involved in nodule  
598 formation. *Plant Physiology* 167,1497-1510.

599 Wang C., Xu X., Hong Z., Feng Y. & Zhang Z. (2015b) Involvement of ROP6 and clathrin in  
600 nodulation factor signaling. *Plant Signaling & Behavior* 10, e1033127.

601 Weber E., Engler C., Gruetzner R., Werner S. & Marillonnet S. (2011) A modular cloning  
602 system for standardized assembly of multigene constructs. *PLoS one* 6, e16765.

603 Yang C.W., González-Lamothe R., Ewan R.A., Rowland O., Yoshioka H., Shenton M., ...,  
604 Sadanandom A. (2006) The E3 ubiquitin ligase activity of Arabidopsis PLANT U-BOX17 and  
605 its functional tobacco homolog ACRE276 are required for cell death and defense. *Plant Cell*  
606 18, 1084-1098.

607 Yano K., Shibata S., Chen W.L., Sato S., Kaneko T., Jurkiewicz A., ..., Umehara Y (2009)  
608 CERBERUS, a novel U-box protein containing WD-40 repeats, is required for formation of the  
609 infection thread and nodule development in the legume-Rhizobium symbiosis. *The Plant*  
610 *Journal* 60, 168-180.

611 Zhou J., Lu D., Xu G., Finlayson S.A., He P. & Shan L. (2015) The dominant negative ARM  
612 domain uncovers multiple functions of PUB13 in *Arabidopsis* immunity, flowering, and  
613 senescence. *Journal of Experimental Botany* 66, 3353-3366.

614

615

## 616 SUPPORTING INFORMATION

617

618 **Table S1:** Primers used for cloning into expression vectors

619 **Table S2:** Primers used in qRT-PCR

620 **Table S3:** Primers used for cloning into GoldenGate and Gateway vectors

621 **Figure S1:** Phylogenetic tree of amino acid sequences of *LjPUB13* with previously  
622 characterized PUBs of other species and *L. japonicus* uncharacterized PUBs

623 **Figure S2:** Amino acid sequence alignment of *LjPUB13* with *AtPUB13*

624 **Figure S3:** Expression levels of *LjPUB13* in *pub13* LORE1 mutants.

625 **Figure S4:** Inoculated 28-day-old wild type and homozygous *pub13.3* mutants

626 **Figure S5:** Formation of nodules in *pub13.1* vs. *har1* mutants.

627 **Figure S6:** Nodule sections of wild type, *pub13.1* and *pub13.2* plants

628 **Figure S7:** ROS accumulation in roots of *pub13* mutants vs wt plants.

629 **Figure S8:** Expression of defence genes in *L. japonicus* wild type and *pub13* mutants

630 **Figure S9:** *LjFLS2* ubiquitination tests

631

632

## 633 **FIGURE LEGENDS**

634

### 635 **Figure 1. *LjPUB13* is an active E3 ubiquitin ligase.**

636 (a) *L. japonicus* *PUB13* gene structure. PUB13 protein contains a U-box motif and an ARM-  
637 repeat domain. The *pub13* mutants carry LORE1 insertions in the coding region of the *PUB13*  
638 gene. The positions of the LORE1 insertions in the *pub13* mutants are marked by arrows.  
639 Numbers indicate nucleotides. (b) *LjPUB13* auto-ubiquitination. PUB13 was purified as a GST  
640 fusion protein. The ubiquitination was detected by both anti-GST and anti-Ub antibodies.  
641 UbcH6 was used as the E2 enzyme in the reactions. The experiment was repeated four times  
642 with similar results.

643

### 644 **Figure 2. *LjPUB13* is expressed in symbiotically active root and nodules.**

645 (a) *LjPUB13* expression in uninoculated *L. japonicus* roots vs roots inoculated by *M. loti* at 7,  
646 14, 21 and 28 days post inoculation and 14, 21 and 28-day-old nodules. Transcript levels were  
647 normalized to those of *UBQ*. Bars represent means (+SE) of three biological replications (n=8).  
648 Significant differences ( $P<0.05$ ) are indicated by asterisk. (b, c, d, f) Expression of *LjPUB13*  
649 in *L. japonicus* transgenic hairy roots transformed with a *ProPUB13::GUS* construct, detected  
650 after GUS staining. In both uninoculated (b, c) and inoculated roots (d, f), *PUB13* promoter  
651 activity was observed in the vascular bundle. At uninoculated plants strong *LjPUB13*  
652 expression is detected in lateral root initiation sites (c, arrows). After rhizobial inoculation (d,  
653 f), *LjPUB13* promoter was active in nodule promordia and young developing nodules at 7dpi  
654 (d, arrows) but not in mature nodules at 21dpi (f). (e and g) show the tissues colonised by  
655 DsRed-expressing rhizobia in (d) and (f), respectively. Bars, 500  $\mu$ m.

656

657 **Figure 3. *L. japonicus pub13* mutants have a reduced growth phenotype.**

658 (a) *L. japonicus pub13.3* plants have shorter roots and shoots compared to wild type. (b) Shoot  
659 length and (c) root length of *pub13* mutants is significantly shorter compared to wild type  
660 plants. Graphs show means (+SE) of three biological replications (n=10). (b, c) The differences  
661 between wt and *pub13* mutants are statistically significant at all time points (P=0.001; one-way  
662 ANOVA and Tukey test), except wt-*pub13.3* shoots at 7 and 14 dpi.

663

664 **Figure 4. Mutants of *LjPUB13* have reduced nodulation.**

665 (a) Nodulation kinetics of wild type and *pub13* mutants, (b) number of nodules per root cm in  
666 *pub13.1* and *pub13.2* mutants compared to wild type plants at 14 and 21 dpi, (c) frequency of  
667 plants carrying nodules, (d) number of infection threads per root cm in *pub13.1* and *pub13.2*  
668 mutants compared to wild type plants at 10 and 14 dpi. Graphs show means (+SE) of at least  
669 three biological replications (n=10). (a, c) the differences between wt and *pub13* mutants are  
670 significant (P<0.05; one-way ANOVA and Tukey test) at all time points, except wt-*pub13.3* at  
671 21 and 28 dpi.

672

673 **Figure 5. *LjPUB13* interacts with *LjBAK1*, *LjFLS2* and *NFR5* *in vitro*.**

674 (a) *In vitro* binding assay of the HIS-tagged *LjPUB13* with the GST-fused cytoplasmic regions  
675 of *LjBAK1* and *LjFLS2*. *LjPUB13* interacts with *LjBAK1<sub>cyt</sub>* and *LjFLS2<sub>cyt</sub>*. (b) *In vitro* binding  
676 assays of the GST-fused *LjPUB13* and *LjBAK1<sub>cyt</sub>* with the HIS-tagged cytoplasmic regions of  
677 the Nod Factor receptors *NFR1* and *NFR5*. *LjPUB13* interacts strongly with *NFR5<sub>cyt</sub>*, while the  
678 *LjPUB13*-*NFR1<sub>cyt</sub>* interaction is undetectable. Sometimes a weak interaction of *LjPUB13*-  
679 *NFR1<sub>cyt</sub>* was observed but this result was not always reproducible. *LjBAK1<sub>cyt</sub>* also interacts  
680 with *NFR5<sub>cyt</sub>*, but no interaction was ever observed between *LjBAK1<sub>cyt</sub>* and *NFR1<sub>cyt</sub>*.

681 After GST pulldown, bead-bound proteins were analyzed by immunoblotting using anti-HIS  
682 and anti-GST antibodies. These experiments were repeated five times.

683

684 **Figure 6. *In planta* interactions of *LjPUB13*<sub>ARM</sub> and *LjBAK1* with the Nod Factor**  
685 **receptors NFR1 and NFR5.**

686 YFP split into N- and C-terminal halves were fused to the ARM domain of *LjPUB13* or to full  
687 length *LjBAK1*, NFR1 and NFR5. *N. benthamiana* leaves were cotransformed with different  
688 construct combinations and leaf epidermal cells were observed via confocal microscopy. The  
689 experiment was repeated four times with similar results. Bars, 50µm.

690

691 **Figure 7. *LjPUB13* specifically ubiquitinates the Nod Factor receptor NFR5.**

692 *LjPUB13* was purified as GST fusion, while the cytoplasmic regions of NFR1 and NFR5 were  
693 purified as HIS fusion proteins. **(a, b)** The NFR5 ubiquitination was detected by an anti-HIS  
694 antibody, using two different E2 ligases: UbcH6 (a) and UbcH5b (b). No ubiquitination was  
695 observed when NFR1 was used as a substrate. **(c)** The presence of *LjPUB13* at the  
696 ubiquitination reactions was detected by an anti-GST antibody (input). **(d)** Purified NFR1-HIS  
697 and NFR5-HIS used at the ubiquitination reactions. The experiments were repeated three times  
698 with similar results.

699

700

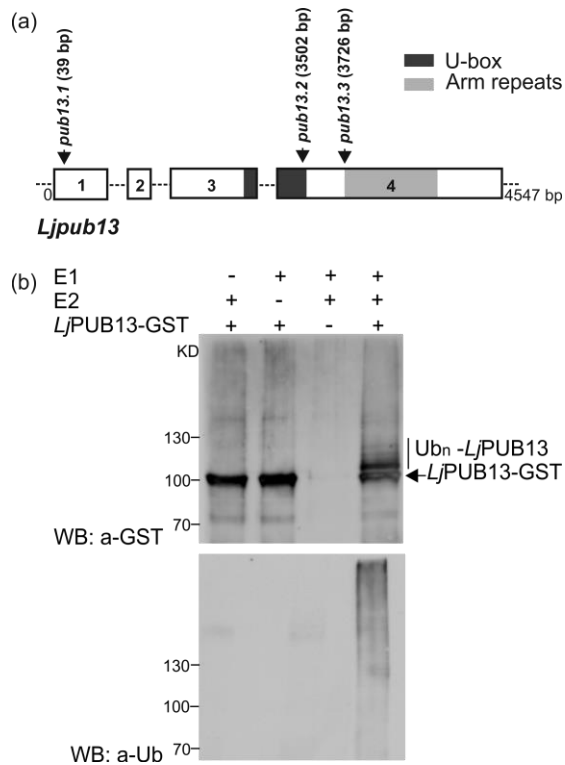

701

702

703 **Figure 1. LjPUB13 is an active E3 ubiquitin ligase.**

704 (a) *L. japonicus* PUB13 gene structure. PUB13 protein contains a U-box motif and an ARM-  
705 repeat domain. The *pub13* mutants carry LORE1 insertions in the coding region of the *PUB13*  
706 gene. The positions of the LORE1 insertions in the *pub13* mutants are marked by arrows.  
707 Numbers indicate nucleotides. (b) LjPUB13 auto-ubiquitination. PUB13 was purified as a GST  
708 fusion protein. The ubiquitination was detected by both anti-GST and anti-Ub antibodies.  
709 UbCH6 was used as the E2 enzyme in the reactions. The experiment was repeated four times  
710 with similar results.

711

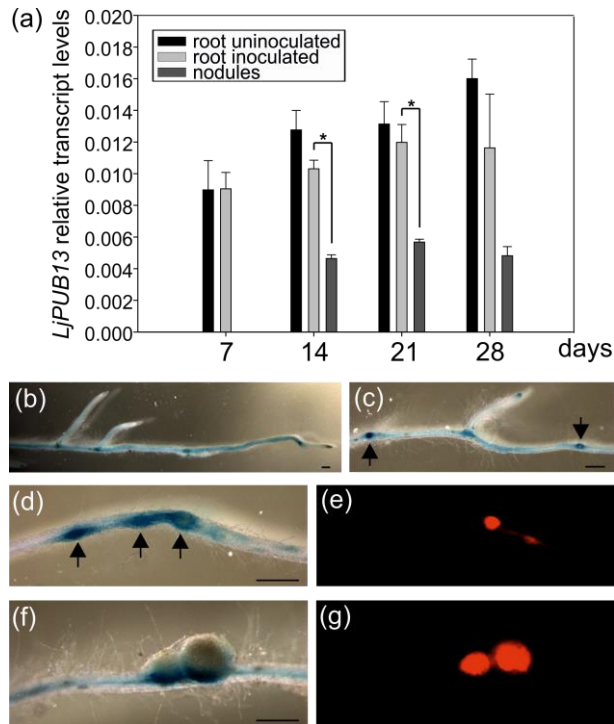

712

713

714 **Figure 2. *LjPUB13* is expressed in symbiotically active root and nodules.**

715 (a) *LjPUB13* expression in uninoculated *L. japonicus* roots vs roots inoculated by *M. loti* at 7,

716 14, 21 and 28 days post inoculation and 14, 21 and 28-day-old nodules. Transcript levels were

717 normalized to those of *UBQ*. Bars represent means (+SE) of three biological replications

718 (n=24). Significant differences ( $P < 0.05$ ) are indicated by asterisk. (b, c, d, f) Expression of

719 *LjPUB13* in *L. japonicus* transgenic hairy roots transformed with a *ProPUB13::GUS* construct,

720 detected after GUS staining. In both uninoculated (b, c) and inoculated roots (d, f), *PUB13*

721 promoter activity was observed in the vascular bundle. At uninoculated plants strong *LjPUB13*

722 expression is detected in lateral root initiation sites (c, arrows). After rhizobial inoculation (d,

723 f), *LjPUB13* promoter was active in nodule promordia and young developing nodules at 7dpi

724 (d, arrows) but not in mature nodules at 21dpi (f). (e and g) show the tissues colonised by

725 DsRed-expressing rhizobia in (d) and (f), respectively. Bars, 500  $\mu$ m.

726



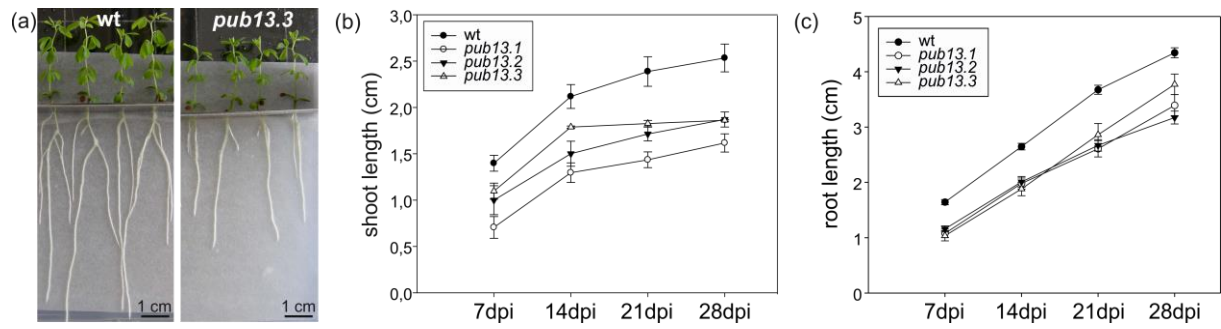

727

728

729 **Figure 3. *L. japonicus pub13* mutants have a reduced growth phenotype.**

730 (a) *L. japonicus pub13.3* plants have shorter roots and shoots compared to wild type. (b) Shoot  
731 length and (c) root length of *pub13* mutants is significantly shorter compared to wild type  
732 plants. Graphs show means (+SE) of three biological replications (n=30). (b, c) The differences  
733 between wt and *pub13* mutants are statistically significant at all time points (P=0.001; one way  
734 ANOVA and Tukey test), except wt-*pub13.3* shoots at 7 and 14 dpi.

735

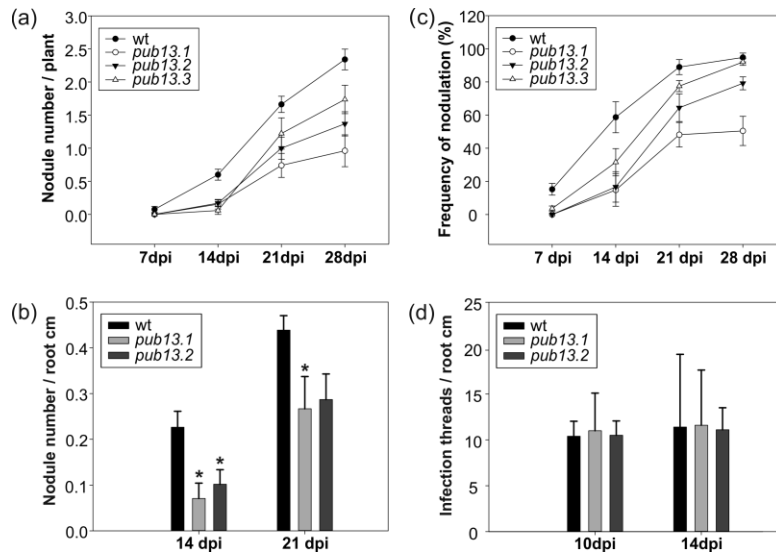

736

737

738 **Figure 4. Mutants of *LjPUB13* have reduced nodulation.**

739 (a) Nodulation kinetics of wild type and *pub13* mutants, (b) number of nodules per root cm in  
740 *pub13.1* and *pub13.2* mutants compared to wild type plants at 14 and 21 dpi, (c) frequency of  
741 plants carrying nodules, (d) number of infection threads per root cm in *pub13.1* and *pub13.2*  
742 mutants compared to wild type plants at 10 and 14 dpi. Graphs show means (+SE) of at least  
743 three biological replications (n=30). (a, c) the differences between wt and *pub13* mutants are  
744 significant ( $P < 0.05$ ; one way ANOVA and Tukey test) at all time points, except wt-*pub13.3* at  
745 21 and 28 dpi.

746

747

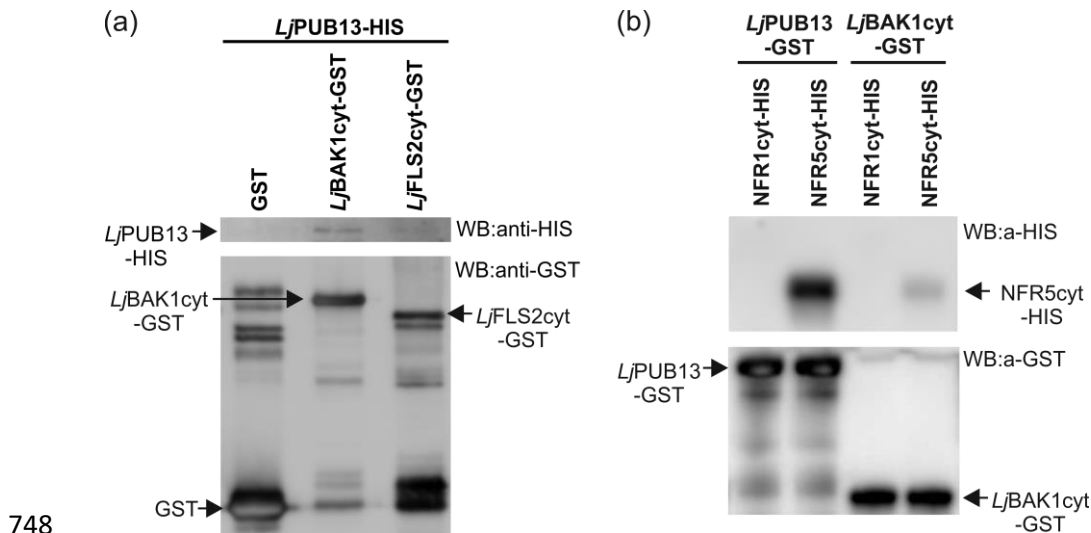

748

749

750 **Figure 5. *LjPUB13* interacts with *LjBAK1*, *LjFLS2* and NFR5 *in vitro*.**

751 **(a)** *In vitro* binding assay of the HIS-tagged *LjPUB13* with the GST-fused cytoplasmic regions  
752 of *LjBAK1* and *LjFLS2*. *LjPUB13* interacts with *LjBAK1*<sub>cyt</sub> and *LjFLS2*<sub>cyt</sub>. **(b)** *In vitro* binding  
753 assays of the GST-fused *LjPUB13* and *LjBAK1*<sub>cyt</sub> with the HIS-tagged cytoplasmic regions of  
754 the Nod Factor receptors NFR1 and NFR5. *LjPUB13* interacts strongly with NFR5<sub>cyt</sub>, while the  
755 *LjPUB13*-NFR1<sub>cyt</sub> interaction is undetectable. Sometimes a weak interaction of *LjPUB13*-  
756 NFR1<sub>cyt</sub> was observed but this result was not always reproducible. *LjBAK1*<sub>cyt</sub> also interacts  
757 with NFR5<sub>cyt</sub>, but no interaction was ever observed between *LjBAK1*<sub>cyt</sub> and NFR1<sub>cyt</sub>.  
758 After GST pulldown, bead-bound proteins were analyzed by immunoblotting using anti-HIS  
759 and anti-GST antibodies. These experiments were repeated five times.

760

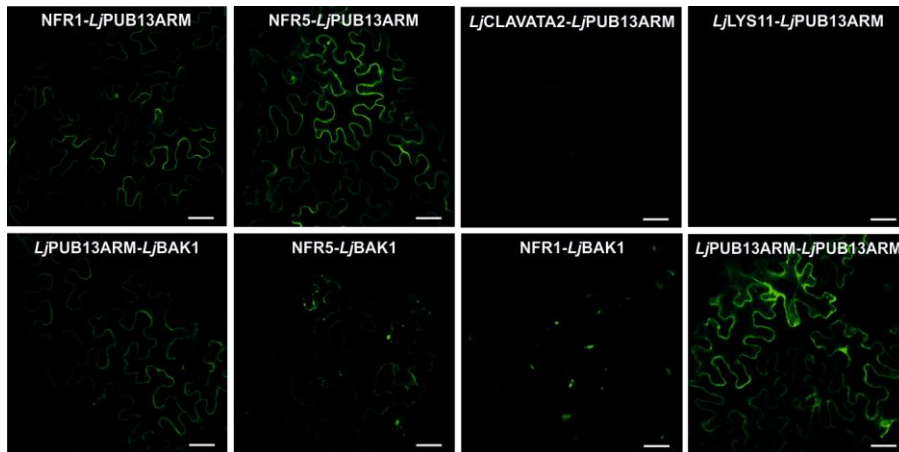

761

762

763 **Figure 6. *In planta* interactions of *LjPUB13*<sub>ARM</sub> and *LjBAK1* with the Nod Factor**  
764 **receptors NFR1 and NFR5.**

765 YFP split into N- and C-terminal halves were fused to the ARM domain of *LjPUB13* or to full  
766 length *LjBAK1*, NFR1 and NFR5. *N. benthamiana* leaves were cotransformed with different  
767 construct combinations and leaf epidermal cells were observed via confocal microscopy. The  
768 experiment was repeated four times with similar results. Bars, 50μm.

769

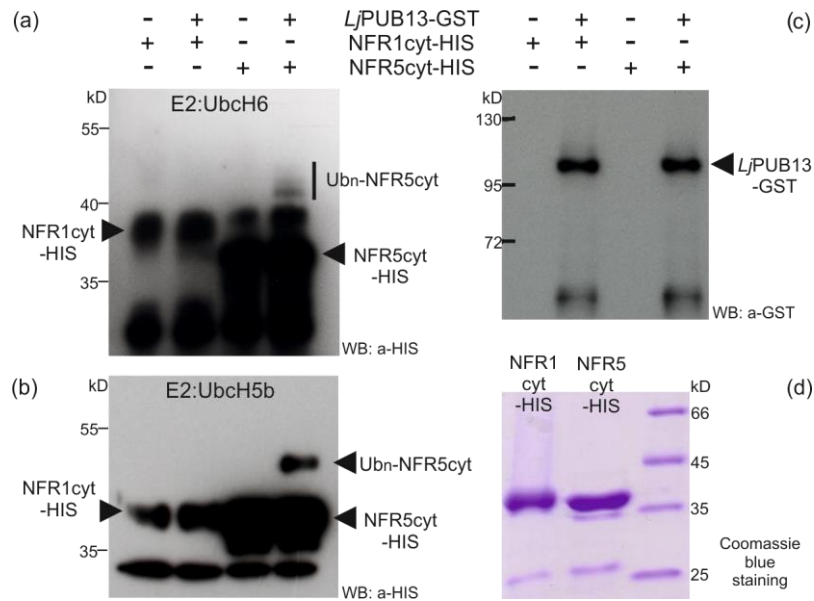

770

771

772 **Figure 7. *LjPUB13* specifically ubiquitinates the Nod Factor receptor NFR5.**

773 *LjPUB13* was purified as GST fusion, while the cytoplasmic regions of NFR1 and NFR5 were  
 774 purified as HIS fusion proteins. (a, b) The NFR5 ubiquitination was detected by an anti-HIS  
 775 antibody, using two different E2 ligases: UbcH6 (a) and UbcH5b (b). No ubiquitination was  
 776 observed when NFR1 was used as a substrate. (c) The presence of *LjPUB13* at the  
 777 ubiquitination reactions was detected by an anti-GST antibody (input). (d) Purified NFR1-HIS  
 778 and NFR5-HIS used at the ubiquitination reactions. The experiments were repeated three times  
 779 with similar results.

780
